# Supplementary material
Source: PubMed Central journal article supplement (PMC3174576)
Supplement: 1107304108_pnas.201107304SI.pdf [file 1107304108_pnas.201107304SI.pdf]

# Supporting Information

Choi et al. 10.1073/pnas.1107304108

## SI Materials and Methods

**Histopathological Procedures and Analysis.** Normal C57BL/6J or melanoma-bearing mice were euthanized, photographed, and dissected. Brain, lungs, liver, spleen, pinnae, tail, melanomas, and lymph nodes were isolated, cut into small cubes, and immediately frozen on dry ice. A collection of fresh tissue samples from each mouse was embedded in optimum cutting temperature (O.C.T.) compound (Tissue-Tek, VWR) and stored at  $-80^{\circ}\text{C}$  before sectioning. The composite tissue blocks were sectioned using a cryostat (Leica Microsystems Inc.) at 6- to 10- $\mu\text{m}$  thickness and were thaw-mounted on glass slides (Fisher Scientific). The sections were fixed in 100% acetone for 10 min, air-dried, rehydrated, and hematoxylin and eosin (H&E)-stained, followed by dehydration in sequential ethanols and xylene. The slides were mounted in Permount (Fisher Scientific). Histologic slides were examined and photographed using Zeiss microscopes equipped with a CCD or digital camera. For melanin-bleached tissue sections, paraffin sections were rehydrated and treated with 1% potassium permanganate for 30–60 min, followed by discolorization with 1% oxalic acid for 5 min. The bleached slides were then H&E-stained.

**RT-PCR for Transgenic Mice.** Fresh-frozen tissues were pulverized, and the tissue powders were either stored at  $-80^{\circ}\text{C}$  for later use or immediately lysed in RNA lysis buffer. Total RNA was isolated following the protocol of the RNeasy spin kit with two additional steps: (i) the use of the Qia shredder spin column to eliminate insoluble pieces of tissues and (ii) DNase I treatment of the RNA purification columns to remove any residual amounts of genomic DNA. Approximately 1  $\mu\text{g}$  of total RNA was used for PCR and one-step RT-PCR for both rat mGluR5 and mouse  $\beta$ -actin control transcripts, according to the protocol of QIAGEN's OneStep RT-PCR kit. The primers for mGluR5 were 5'-CAG TCA GCC TCA GTG CCA CAG TGG CCC TGG-3' and 5'-GCG CGG CCT GGC AGC CGC GGG GAA GCT CTC-3'.  $\beta$ -Actin-positive control primers flanked intron/exon junction areas to prevent them from annealing to genomic  $\beta$ -actin sequence in case there was any DNA contamination in the total RNA preparation. The primers were 5'-CCT TCT TGG GTA TGG AAT-3' and 5'-AGG AGC AAT GAT CTT GAT-3'. Reverse transcriptase reaction was set at  $50^{\circ}\text{C}$  for 30 min, followed by heating at  $95^{\circ}\text{C}$  for 15 min for inactivation of reverse transcriptase and activation of TaqGold. PCR cycling for mGluR5 consisted of 30 cycles of  $94^{\circ}\text{C}$  for 1 min,  $60^{\circ}\text{C}$  for 1 min, and  $72^{\circ}\text{C}$  for 1 min; and PCR cycling for  $\beta$ -actin was the same except the annealing temperature was  $50^{\circ}\text{C}$ . The PCR products were detected in 1.5% agarose gel and verified by DNA sequencing after being subcloned to a TA cloning vector (pCRII, Invitrogen).

**Western Blotting.** The Bullet Blender (Next Advance) was used for lysing ear, tail, and brain tissues at  $4^{\circ}\text{C}$  in lysis buffer (50 mM Tris-HCl, 150 mM NaCl, 2% Triton X-100, 1% SDS, 10 mM EDTA, and 10% glycerol) with complete protease inhibitor mixture tablets (Roche Applied Science). After quantification of the protein concentration of each sample with Pierce BCA protein assay reagent (Thermo Scientific), the lysates were subject to SDS/PAGE and Western blotting with the indicated antibodies. The bands were visualized with the SuperSignal West

Pico Chemiluminescent Substrate (Thermo Scientific). Myc, phospho ERK1/2, ERK1/2, and  $\alpha$ -tubulin antibodies were purchased from Cell Signaling Technology. EGFR, PCNA, and  $\beta$ -actin antibodies were purchased from Abcam, Santa Cruz Biotechnology, and Applied Biological Materials, respectively.

**Fluorescence-Based Immunohistochemistry.** The tumor tissue samples were embedded in O.C.T. (Tissue-Tek, VWR) and stored at  $-80^{\circ}\text{C}$  before sectioning, and the tissue blocks were sectioned using a cryostat (Leica Microsystems Inc.) at 6- to 10- $\mu\text{m}$  thickness and were thaw-mounted on glass slides (Fisher Scientific, Inc.). The sections were fixed in 100% acetone for 10 min, air-dried, and rehydrated. Then the sections were permeabilized and blocked with 10% goat serum in PBS and then incubated with rabbit anti-Myc antibody (Sigma). Alexa568-conjugated goat anti-rabbit secondary antibody (Invitrogen) and Hoechst were incubated for detection of signals.

**Quantitative RT-PCR.** Human melanoma cell lines were kindly provided by Dr. Nicholas P. Restifo at the National Cancer Institute/National Institutes of Health (Bethesda, MD), and human metastatic melanoma tissue samples were purchased from OriGene, Inc. The human melanoma samples were collected from patients with metastatic melanoma, and they are all histopathologically diagnosed and verified. O.C.T. blocks of fresh-frozen melanoma tissue were made by snap-freezing in liquid nitrogen and stored at  $-80^{\circ}\text{C}$  before use.

Total RNA was purified using Invitrogen's RNeasy mini kit following the manufacturer's manual with modifications. In brief,  $\sim 5 \times 10^6$  human melanoma cells and 30 mg of pulverized melanoma tissue were lysed in RNA lysis buffer, and the insolubles were eliminated through a Qia Shredder spin column. Total RNA was eluted in 50  $\mu\text{L}$  of RNase-free water via a RNeasy spin column pretreated with DNase I. Total RNA concentration was measured in a range of 0.5  $\mu\text{g}/\mu\text{L}$ . Reverse transcription (RT) was then performed by mixing 10  $\mu\text{L}$  of  $2\times$  RT master mix with 1–2  $\mu\text{g}/10 \mu\text{L}$  of total RNA and by incubating at  $37^{\circ}\text{C}$  for 2 h using ABI's High-Capacity cDNA RT Kit and protocol. The cDNAs were stored at  $-80^{\circ}\text{C}$  before use.

To quantify mRNA expression level in human melanomas, real-time RT-PCR was carried out using ABI's StepOne PCR machine, Power SYBR-GREEN kit and protocol, and intron-flanking primers designed to eliminate any chance of genomic DNA use in the reaction. Primer sequences used are the following: human mGluR1 (5'-gtggttgatgagaaggag-3' and 5'-gttgctcactcaagatagc-3'), human mGluR5 (5'-tggagatacattcttcg-3' and 5'-ccaaggcaggcaaacaccac-3'), and human  $\beta$ -actin (5'-ccttctggcattggag-3' and 5'-aggagcaatgatcttgat-3'). Approximately 1  $\mu\text{g}$  of cDNA, 20 pmol of each primer, and 15  $\mu\text{L}$  of SYBR-GREEN were subjected to a 30- $\mu\text{L}$  real-time PCR with 40 cycles of 1 min at each step of  $94^{\circ}\text{C}$ ,  $55^{\circ}\text{C}$ , and  $72^{\circ}\text{C}$ . Human brain and normal human melanocyte cDNAs were also tested as controls side by side with cDNAs from human melanoma cell lines and tissue samples. The PCR products were all confirmed to be a single band in agarose gels, and each reaction was done in duplicate. Relative Ct values were calculated for each sample when the cycle threshold of mGluR1 and mGluR5 were normalized or adjusted with that of  $\beta$ -actin in the same sample.
